# Supplementary material for: Atrial fibrillation after cardiac surgery: identifying candidate predictors through a Delphi process
Source: PubMed Central journal article supplement — BMJ Open. 2024 Sep 25;14(9):e086589. doi: 10.1136/bmjopen-2024-086589 (PMC11425939; doi:10.1136/bmjopen-2024-086589), 2024-09-25
Supplement: bmjopen-14-9-s001.pdf [file bmjopen-14-9-s001.pdf]

## Supplementary materials

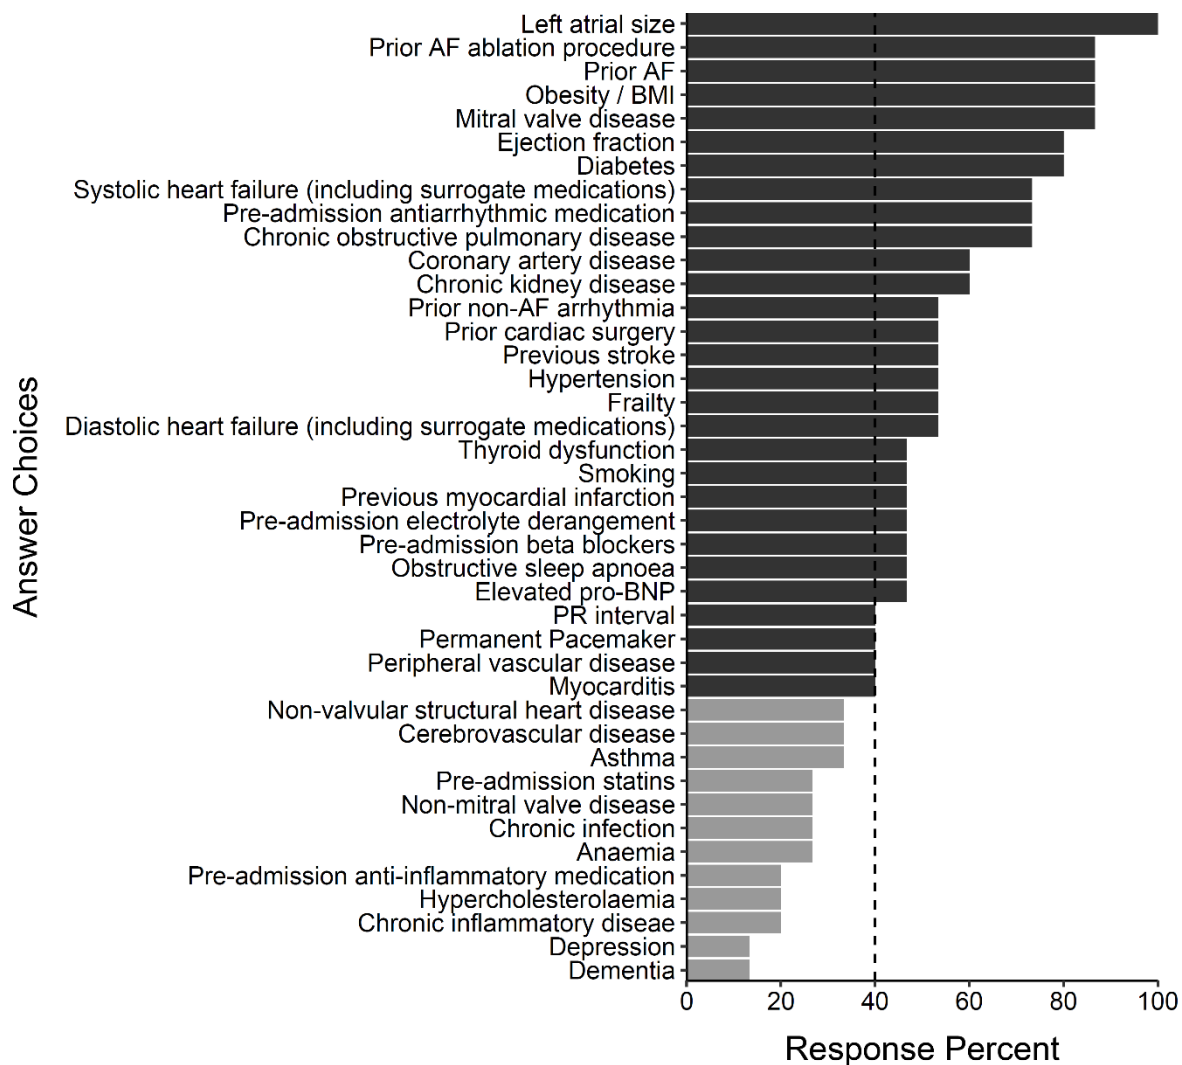

Supplementary Figure 1 – Comorbidity predictors identified by the Delphi panel in round 1. Light grey bars represent predictors not selected by 40% of the panel in round 2 and therefore not selected for the final list. F = atrial fibrillation.
